# Supplementary material for: 3,3′,5-Triiodothyroacetic acid (TRIAC) induces embryonic ζ-globin expression via thyroid hormone receptor α
Source: PubMed Central journal article supplement (PMC8235803; doi:10.1186/s13045-021-01108-z), 2021-06-26

# Supplemental Figure 1

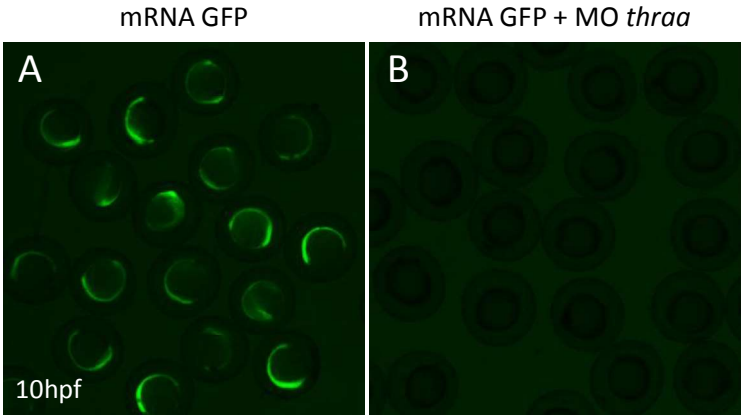

Supplement: 13045_2021_1108_MOESM2_ESM.pdf [file 13045_2021_1108_MOESM2_ESM.pdf]
